# Supplementary material
Source: PubMed Central journal article supplement (PMC4840458)
Supplement: NIHMS777638-supplement-supplement_1.pdf [file NIHMS777638-supplement-supplement_1.pdf]

Supplemental Table 1

Comparison of Connective Tissue Features between FMD cohort and published Marfan and Overlapping Connective Tissue Disease. Adapted from Glesby et al JAMA 1989.(14)

|                  | FMD, n=139<br>% | Marfan n=40,<br>% | OCTD*<br>n=74,<br>% |
|------------------|-----------------|-------------------|---------------------|
| Wrist sign       | 17.3            | 38                | 35                  |
| Thumb sign       | 7.2             | 50                | 30                  |
| Pes planus       | 12.9            | 58                | 30                  |
| Scoliosis        | 27.0            | 38                | 34                  |
| Pectus deformity | 7.2             | 63                | 45                  |
| High arch palate | 33.1            | 65                | 41                  |
| Skin striae      | 5.8             | 53                | 34                  |
| Myopia           | 68.8            | 58                | 43                  |

\*OCTD indicates overlapping connective tissue disease
